# Supplementary material for: The soybean experiment ‘1000 Gardens’: a case study of citizen science for research, education, and beyond
Source: PubMed Central journal article supplement (PMC6439140; doi:10.1007/s00122-018-3134-2), 2018-07-03
Supplement: 122_2018_3134_MOESM1_ESM.pdf [file 122_2018_3134_MOESM1_ESM.pdf]

# **The Soybean Experiment “1000 Gardens”: A case study of Citizen Science for research, education, and beyond**

Tobias Würschum<sup>1</sup>, Willmar L. Leiser<sup>1</sup>, Felix Jähne<sup>1</sup>, Kristina Bachteler<sup>2</sup>, Martin Miersch<sup>2</sup>, and  
Volker Hahn<sup>1\*</sup>

<sup>1</sup> State Plant Breeding Institute, University of Hohenheim, 70593 Stuttgart, Germany

<sup>2</sup> Life Food GmbH, Taifun Tofuprodukte, 79108 Freiburg, Germany

✉ Volker Hahn, email: [volker.hahn@uni-hohenheim.de](mailto:volker.hahn@uni-hohenheim.de)

## **Supplementary Material**

**Table S1.** Soybean breeding lines used in this study. The parents of the crosses are shown in the outer cells. Black numbers indicate biparental crosses between parents shown in the left column and the top row, red numbers display 3-way-crosses with parents from the left and right column and the top row, and blue numbers refer to 4-way crosses where all 4 parents in the outer cells are included.

|          | Taifun3 | Primus | Protina | Gallec  | Sigalia | Sultana | ESMentor | Merlin | Sirelia | Proteix | Amandine |         |
|----------|---------|--------|---------|---------|---------|---------|----------|--------|---------|---------|----------|---------|
| Taifun3  |         |        |         |         |         |         | 10       | 6      |         |         |          |         |
| Primus   |         |        |         | 1       | 83      |         | 33       | 48     | 7/11    |         | 8        | Sultana |
| Protina  |         | 126    |         | 17      | 103     |         |          |        |         | 28/49   |          | Primus  |
| Gallec   |         | 106    | 122     |         |         |         | 28       |        |         |         |          | Primus  |
| Sigalia  |         |        |         | 243     |         | 94      |          |        | 6       |         | 2        | Primus  |
| Sultana  |         | 112    |         |         |         |         |          |        |         |         |          |         |
| ESMentor | 6       | 17     |         |         |         |         |          |        |         |         |          |         |
| Merlin   | 26      |        |         |         |         |         |          |        |         | 79      |          |         |
| Sirelia  |         | 32     |         |         |         |         |          |        |         | 14      |          | Protina |
| Proteix  | 7       | 24     |         |         | 39      |         |          |        |         |         |          | Protina |
| Amandine |         | 4      | 3       |         |         |         |          |        | 2       |         |          | Primus  |
| Aligator |         | 9      |         |         |         |         |          |        | 16      |         |          |         |
| Paradis  |         | 16     |         |         |         |         |          |        |         |         |          |         |
| Korus    |         | 10     |         |         |         |         |          |        | 16      |         |          |         |
| Naya     |         | 17     |         |         |         |         |          |        | 20      |         |          |         |
| Solena   |         | 3      |         |         |         |         |          |        | 18      |         |          |         |
| Capnor   |         | 9      |         |         |         |         |          |        | 34      |         |          |         |
| 1152     |         |        |         |         |         |         | 2        |        |         |         |          |         |
| Aveline  |         |        |         |         |         |         |          |        | 11      | 70      |          | Protina |
|          |         | Gallec |         | Proteix | Primus  |         |          |        |         | Protina |          |         |

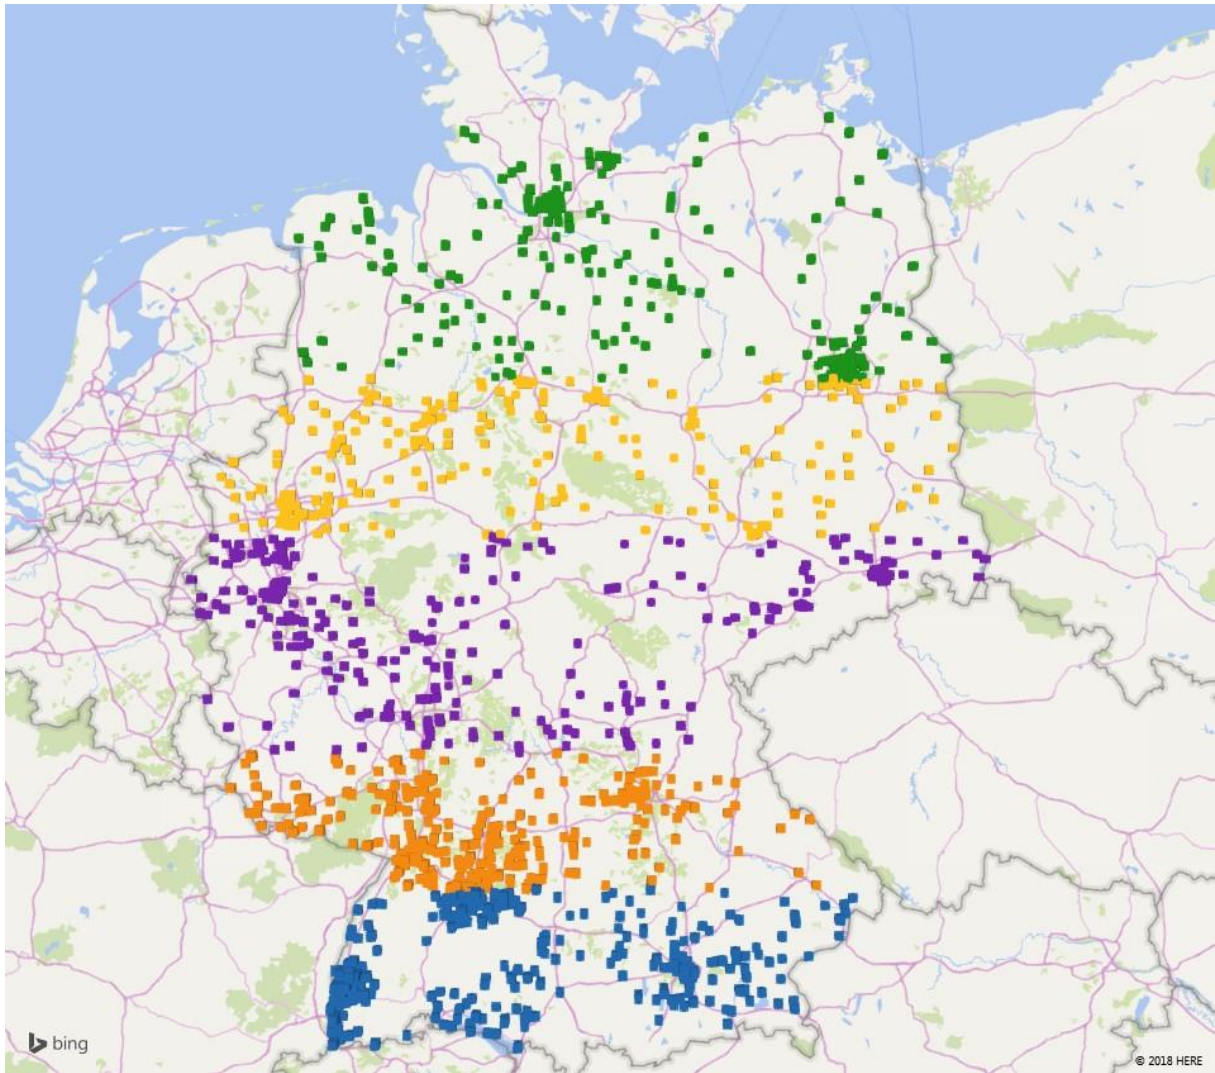

**Fig. S1** Randomization of the participants of Experiment 1 into 10 replications of which two each formed 5 latitudinal zones.
